# Supplementary material for: Structural evolution of rayon-based carbon fibers induced by doping boron
Source: Royal Society of Chemistry journal article supplement (doi:10.1039/c4ra07892f), 2014-01-01
Supplement: c4ra07892f1.pdf [file c4ra07892f1.pdf]

## Supplementary material

### Structural evolution of rayon-based carbon fibers induced by doping boron

Huiqi Wang <sup>a, b\*</sup>, Tao Han <sup>a</sup>, Jinhua Yang <sup>b</sup>, Zechao Tao <sup>b</sup>, Quanguo Guo <sup>b\*</sup>, Zhanjun  
Liu <sup>b</sup>, Zhihai Feng <sup>c</sup>, Lang Liu <sup>b</sup>

<sup>a</sup> *Institute of Inorganic Non-metallic materials, School of Materials Science and  
Engineering, North University of China, Taiyuan 030051, China*

<sup>b</sup> *Key Laboratory of Carbon Materials, Institute of Coal Chemistry, Chinese Academy  
of Sciences, Taiyuan 030001, China*

<sup>c</sup> *National Key Laboratory of Advanced Functional Composites Materials, Aerospace  
Research Institute of Material and Processing Technology, Beijing 100076, China*

---

\* **Corresponding author:** Tel.: +86-351-4084106; fax: +86-351-4083952.

*E-mail address:* hqiwang@163.com(H. Wang); qgguo@sxicc.ac.cn (Q. Guo).

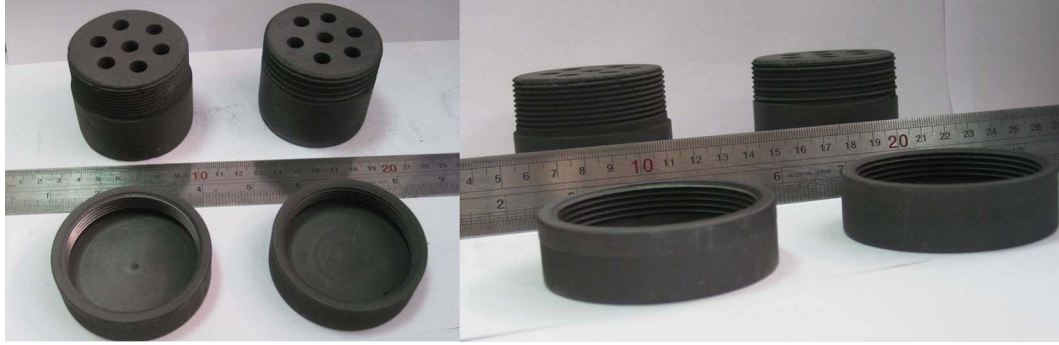

**Fig. S1** A picture of the B<sub>4</sub>C/graphite crucible (BGC)

Mechanical properties of single carbon fiber were performed using a single fiber electronic tensile strength tester (LLY-06E, China). The specimens were prepared by fixing the filament on a paper holder with an instant cyanoacrylate adhesive, as reported elsewhere <sup>1</sup>. A gauge length of 20 mm and crosshead speed of 0.5 mm/min were applied for the tests. At least 50 measurements were done for each fiber specimens. All tests were finished at room temperature (23±3 °C, 50±5% relative humidity).

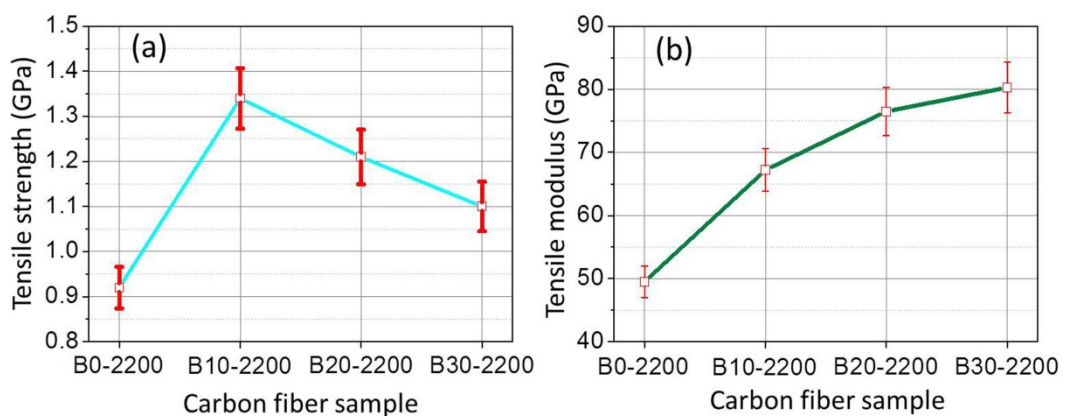

**Fig. S2** Mechanical properties of boron-doped RCFs treated to 2200 °C (a) tensile strength; (b) tensile modulus.

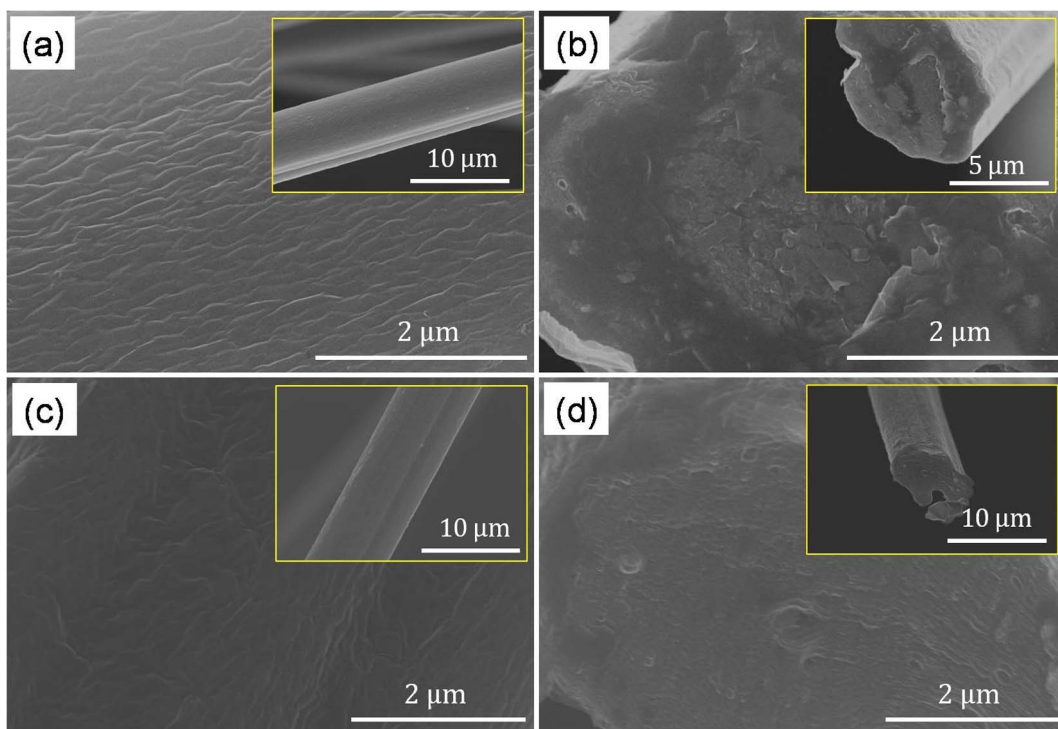

**Fig. S3** Surface and cross-section morphologies by FE-SEM examination of the B1-24 (a, b) and B1-26 (c, d)

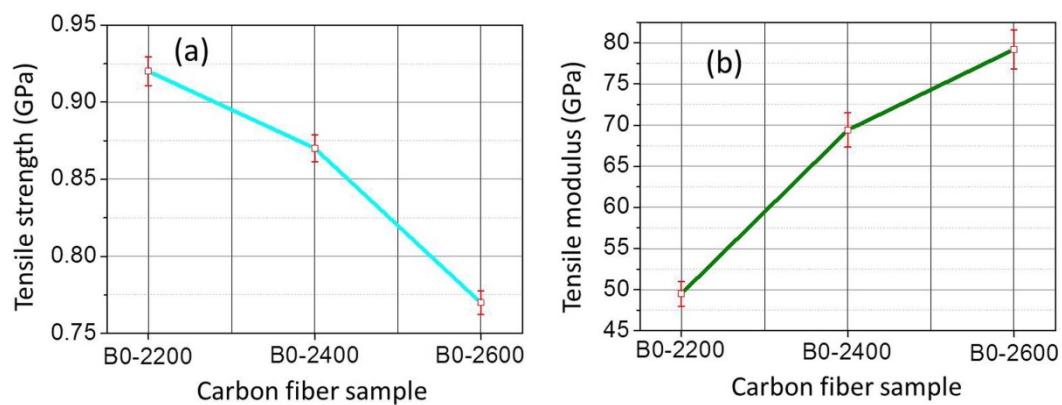

**Fig. S4** Mechanical properties of boron-undoped treated to different temperatures (a) tensile strength; (b) tensile modulus.

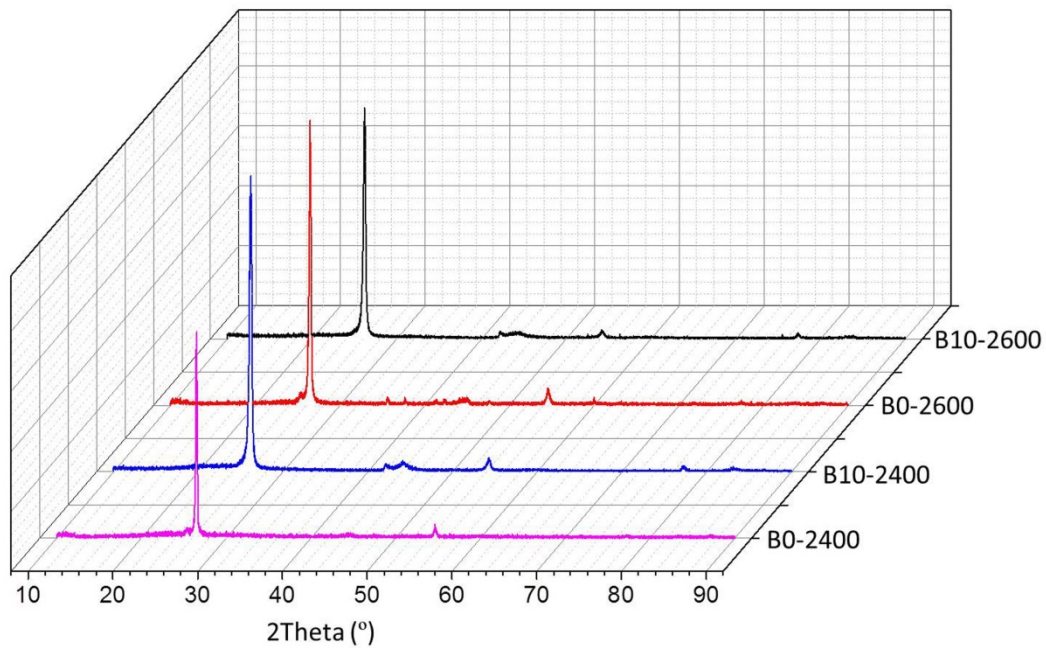

**Fig. S5** XRD patterns of boron-undoped and boron-doped RCFs treated to 2400 and 2600 °C.

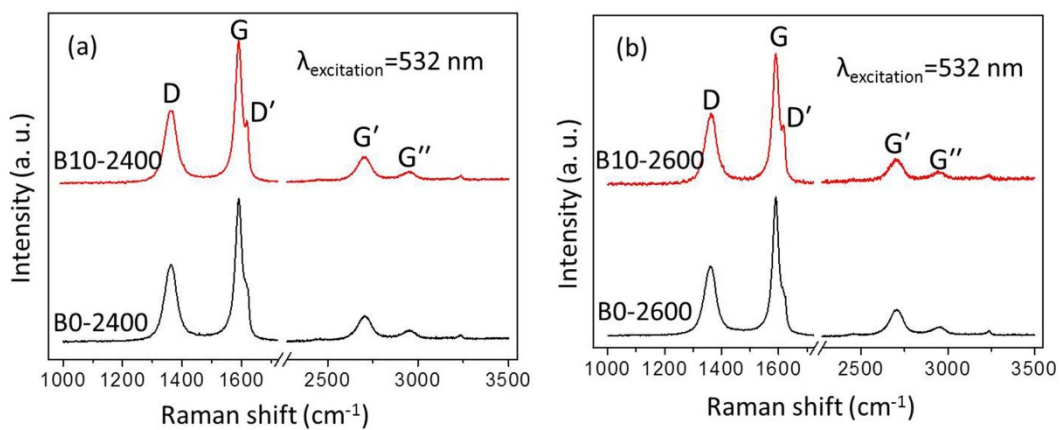

**Fig. S6** Room temperature Raman spectra of boron-undoped and boron-doped RCFs treated to (a) 2400 °C and (b) 2600 °C.

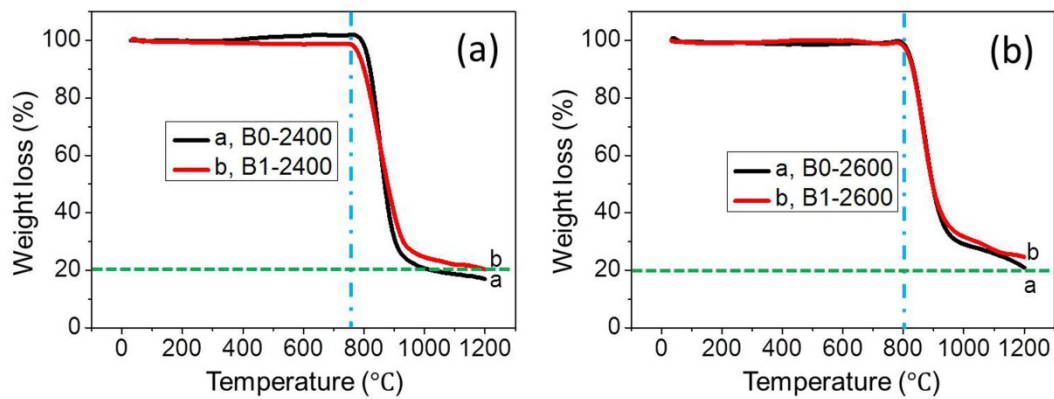

**Fig. S7** TGA curves of boron-undoped and boron-doped RCFs treated to (a) 2400 °C and (b) 2600 °C

#### References

1. K. Naito, Y. Tanaka, J. M. Yang and Y. Kayawa, *Carbon*, 2008, **46**, 189-195.
